# Supplementary material for: Insertion sequences drive the emergence of a highly adapted human pathogen
Source: PubMed Central journal article supplement (PMC7643977; doi:10.1099/mgen.0.000265), 2019-04-04
Supplement: mgen-6-265-s001.pdf [file mgen-6-265-s001.pdf]

1 **Supporting Information**

2 **Insertion sequences drive the emergence of a highly adapted**  
3 **human pathogen**

4 Erwin Sentausa<sup>1#</sup>, Pauline Basso<sup>1+</sup>, Alice Berry<sup>1</sup>, Annie Adrait<sup>2</sup>, Gwendoline  
5 Bellement<sup>1,2∞</sup>, Yohann Couté<sup>2</sup>, Stephen Lory<sup>3</sup>, Sylvie Elsen<sup>1\*</sup> and Ina Attrée<sup>1\*</sup>

6  
7 \*Corresponding authors: [ina.attree-delic@cea.fr](mailto:ina.attree-delic@cea.fr); [sylvie.elsen@cea.fr](mailto:sylvie.elsen@cea.fr).

8  
9 **The supplementary information includes:**

10 Supplementary Materials and Methods

11 Supplementary References

12 Supplementary Figure S1

13 Supplementary Tables S1 to S11

14

15

16

17

## 18 **Supplementary Materials and Methods**

### 19 **Genome sequencing, assembly, annotation and comparison**

20 Bacterial DNA was extracted using the EZ-10 Spin Column Bacterial Genomic DNA  
21 Miniprep Kit (Bio Basic Inc., Canada). DNA extracted from CLJ1 bacteria was sequenced  
22 on Illumina HiSeq 2000 systems at the Beijing Genomics Institute (China) in 2x50 base-  
23 pairs (bp) paired-end mode, generating 12,333,368 reads with a genome coverage of 90-  
24 100x. Reads were trimmed to remove low quality sequences (limit = 0.05) and ambiguous  
25 nucleotides (maximum two nucleotides allowed). Reads were then assembled *de novo*  
26 using CLC Genomics Workbench 9.0 (Qiagen, Aarhus, Denmark). In parallel, PacBio  
27 (Base Clear, Leiden, Netherlands) technology was also used, providing 114,707 reads.  
28 The resulting contigs were then combined with the Illumina reads using the “Join Contigs”  
29 function in the CLC Genome Finishing Module version 1.6.1 (Qiagen). Contigs or  
30 scaffolds consisting of fewer than 100 reads were filtered out, and BLAST [1] searches  
31 were performed to identify and remove those that showed no match to *Pseudomonas*  
32 sequences in GenBank [2]. CLJ3 genomic DNA was sequenced using Illumina MiSeq at  
33 the Biopolymers Facility, Harvard Medical School, Boston, USA, in 150-bp single-end  
34 runs, generating 2,495,173 reads. Quality trimming was performed using CLC Genomics  
35 Workbench 9.0, applying the same parameters as those used for CLJ1, followed by *de*  
36 *novo* assembly with a minimal contig length of 1 kb. The order of both CLJ1 and CLJ3  
37 scaffolds or contigs was determined based on the genome sequence of PA7 strain using  
38 the “move contigs” tool in Mauve Genome Alignment Software (version snapshot\_2015-  
39 02-13) [3]. Average nucleotide identity between genomes was estimated using the ANI  
40 calculator tool on the enveomics collection server [4] with minimum alignment length,

41 identity, and number set to 700 bp, 70%, and 50, respectively, using a 1,000-bp window  
42 size and 200-bp step size. SNPs between CLJ1 and CLJ3 genomes were detected by  
43 mapping trimmed CLJ3 reads to the CLJ1 genome in CLC Genomics Workbench 9.0,  
44 and then using the Basic Variant Detection 1.71 tool in the Workbench with the following  
45 parameters: Ploidy = 1, Ignore positions with coverage above = 100,000, Restrict calling  
46 to target regions = Not set, Ignore broken pairs = Yes, Ignore non-specific matches =  
47 Reads, Minimum coverage = 10, Minimum count = 2, Minimum frequency (%) = 35.0,  
48 Base quality filter = Yes, Neighborhood radius = 5, Minimum central quality = 20, Minimum  
49 neighborhood quality = 15, Read direction filter = No, Relative read direction filter = Yes,  
50 Significance (%) = 1.0, Read position filter = No, Remove pyro-error variants = No.  
51 Clusters of Orthologous Groups (COG) annotation was performed using the WebMGA  
52 server [5] with an E-value cutoff of 0.001. Subcellular localizations of PA7 proteins were  
53 retrieved from the Pseudomonas Genome Database, whereas those of CLJ1 and CLJ3  
54 proteins were predicted using PSORTb version 3.0.2 [6] and LocTree3 [7]. Orthologous  
55 genes across the strains were identified using OrthoMCL version 2.0.9 [8], with a BLASTp  
56 E-value cutoff of  $1 \times 10^{-5}$  and the default Markov cluster algorithm (MCL) inflation  
57 parameter of 1.5.

## 58 **Transcriptome Analysis**

59 The Illumina libraries were prepared and sequenced at the Biopolymer Facility, Harvard  
60 Medical School, Boston, USA. Illumina HiSeq 2500 was used for the sequencing with 50-  
61 bp single-end runs, generating 3,225,727 and 21,633,018 reads for CLJ1 and 2,139,035  
62 and 56,804,547 reads for CLJ3. For each replicate, raw RNA-Seq reads were trimmed in  
63 CLC Genomics Workbench 9.0 using the same parameters as for genome sequencing

64 reads. The trimmed reads were then mapped to the annotated CLJ1 genome using the  
65 RNA-Seq analysis tool. The total number of reads mapped to the genes was incorporated  
66 into a table and analyzed as raw counts using the DESeq2 differential expression analysis  
67 pipeline (87). DESeq2 performs internal normalization for sequencing depth and RNA  
68 composition using the median of ratios method. DESeq2 then fits negative binomial  
69 generalized linear models for each gene and uses the Wald test for significance testing.  
70 Genes that were differentially expressed between CLJ1 and CLJ3 were identified after  
71 applying a 5% False Discovery Rate (FDR) filter.

72

### 73 **Proteomics**

74 Sample preparation. Whole-cell extracts. Overnight cultures of CLJ1 were diluted to an  
75 OD<sub>600</sub> of 0.1 in 30 mL culture broth and then the cultures were incubated at 37 °C under  
76 shaking until they reached OD<sub>600</sub> 0.8. CLJ3 was left overnight at room temperature and  
77 then cultured at 37 °C under shaking to OD<sub>600</sub> 0.8. The 30-mL bacterial cultures were  
78 then centrifuged at 6,000 rpm, 4 °C for 10 min, and supernatants were filtered on 0.22-  
79 µm filters. Total membranes separation. Pellets were re-suspended in 1 mL of 10 mM  
80 Tris-HCl (pH8), 20% sucrose buffer supplemented with protease inhibitors cocktail (PIC,  
81 Roche, Basel, Switzerland) and cells were disrupted by sonication. Intact bacteria were  
82 removed by centrifugation at 8,000 rpm for 10 min at 4 °C. The total membrane fraction  
83 was then collected by ultracentrifugation at 200,000 g for 1 h at 4 °C. The pelleted fraction  
84 was washed twice with 1 mL of 10 mM Tris-HCl, 20 mM MgCl<sub>2</sub>, pH8, supplemented with  
85 PIC, and re-suspended in 500 µL of the same buffer. Supernatant fraction. Proteins  
86 contained in supernatants were precipitated by a TCA-sarkosyl method (0.5% final

87 volume of sarkosyl and 7.5% final volume of TCA) for 2 h on ice and centrifuged at 12,000  
88 rpm for 15 min at 4°C. Pellets were washed twice with tetrahydrofuran, and re-suspended  
89 in 50 µL of Laemmli loading buffer. Samples prepared in triplicate were then analyzed by  
90 SDS-PAGE and immunoblotting using antibodies directed against three synthetic ExIA  
91 peptides ([9], 1:1 000); against RpoA (1:5 000), as a control for whole-cell; against TagQ  
92 ([10], 1:10 000), to track the membrane fraction; and against DsbA (1:2 000), to monitor  
93 the periplasm fraction. Antibody binding was revealed using appropriate HRP-coupled  
94 secondary antibodies, anti-rabbit (1:50 000) and anti-mouse (1:5 000) (Sigma-Aldrich).  
95 Western blots were developed using Luminata Crescendo Western HRP (Millipore)  
96 substrate.

97 Mass spectrometry-based quantitative proteomic analyses. Protein extracts were  
98 prepared as described in [11]. Briefly, proteins were stacked in the top of an SDS-PAGE  
99 gel (NuPAGE 4-12%, ThermoFisher Scientific), and stained with Coomassie blue (R250,  
100 Bio-Rad) before in-gel digestion using modified trypsin (Promega, sequencing grade).  
101 Resulting peptides were analyzed by nanoliquid chromatography coupled to tandem  
102 mass spectrometry (Ultimate 3000 coupled to LTQ-Orbitrap Velos Pro, Thermo Scientific)  
103 using a 120-min gradient (2 analytical replicates per biological replicate). RAW files were  
104 processed using MaxQuant [12] version 1.5.3.30. The protein contents of total,  
105 membrane, and secretome proteomes from CLJ1 and CLJ3 were analyzed  
106 independently. Spectra were searched against an in-house CLJ database and the  
107 frequently-observed contaminants database included in MaxQuant. Trypsin was selected  
108 as the enzyme, and two missed cleavages were allowed. Peptide modifications allowed  
109 during the search were: carbamidomethylation (C, fixed), acetyl (Protein N-ter, variable)

110 and oxidation (M, variable). Minimum peptide length was set to seven amino acids.  
111 Minimum number of peptides, razor + unique peptides and unique peptides were all set  
112 to 1. Maximum FDRs - calculated by employing a reverse database strategy - were set  
113 to 0.01 at peptide and protein levels. Intensity-based absolute quantification values iBAQ  
114 [13] were calculated from MS intensities of unique+razor peptides. Statistical analyses  
115 were performed using ProStaR [14]. Proteins identified in the reverse and contaminant  
116 databases, proteins only identified by site (corresponding to proteins only identified by  
117 peptides that carry one or more modified amino acids), and proteins exhibiting fewer than  
118 three iBAQ values in any one condition were discarded from the list. After log<sub>2</sub>  
119 transformation, intensity values were normalized by median centering before imputing  
120 missing values (missing values were replaced by the 2.5 percentile value for each  
121 column); statistical testing was conducted using a *limma* t-test. Differentially-recovered  
122 proteins were sorted out using a log<sub>2</sub>(fold change) cutoff of 2 and an FDR threshold on  
123 remaining p-values of 1%, applying the Benjamini-Hochberg procedure. The various lists  
124 were then combined. In total, this procedure produced a list of 2,852 quantified proteins.

## 125 **RT-qPCR**

126 Yield, purity and integrity of RNA were evaluated on a Nanodrop device and by agarose  
127 gel migration. Complementary DNA was synthesized from 3 µg of RNA using the  
128 SuperScript III First-Strand Synthesis System (Invitrogen), with or without SuperScript III  
129 RT enzyme to check for the presence of genomic DNA. The CFX96 Real-Time system  
130 (Bio-Rad) was used to amplify the cDNA, and quantification was performed using SYBR  
131 green fluorescent molecules. cDNA was incubated with 5 µL of Gotaq qPCR master mix  
132 (Promega), and specific reverse and forward primers were used at a final concentration

133 of 125 nM in a total volume of 10  $\mu$ L. Cycle parameters for the real-time PCR were: 95  $^{\circ}$ C  
134 for 2 min, 40 cycles of 95  $^{\circ}$ C for 15 s and 60  $^{\circ}$ C for 45 s, and finally a melting curve from  
135 65  $^{\circ}$ C to 95  $^{\circ}$ C by 0.5- $^{\circ}$ C increments for 5 s to assess the specificity of the amplification.  
136 To generate standard curves, serial dilutions of pooled cDNA from both CLJ strains were  
137 used. Experiments were performed with three biological samples for each strain, in  
138 duplicate, and the results were analyzed with the CFX manager software (Bio-Rad). The  
139 relative expression of mRNAs was calculated using the  $\Delta\Delta$ Cq method after normalizing  
140 to *rpoD* reference Cq values.

#### 141 **Supplementary References**

- 142 1. **Altschul SF, Madden TL, Schaffer AA, Zhang J, Zhang Z et al.** Gapped BLAST  
143 and PSI-BLAST: a new generation of protein database search programs. *Nucleic acids*  
144 *research* 1997;25(17):3389-3402.
- 145 2. **Clark K, Karsch-Mizrachi I, Lipman DJ, Ostell J, Sayers EW.** GenBank. *Nucleic*  
146 *acids research* 2016;44(D1):D67-72.
- 147 3. **Darling AC, Mau B, Blattner FR, Perna NT.** Mauve: multiple alignment of  
148 conserved genomic sequence with rearrangements. *Genome research* 2004;14(7):1394-  
149 1403.
- 150 4. **Rodriguez-R LM, Konstantinidis KT.** The enveomics collection: a toolbox for  
151 specialized analyses of microbial genomes and metagenomes. *PeerJ Preprints*  
152 2016;4:e1900v1.
- 153 5. **Wu S, Zhu Z, Fu L, Niu B, Li W.** WebMGA: a customizable web server for fast  
154 metagenomic sequence analysis. *BMC genomics* 2011;12:444.
- 155 6. **Yu NY, Wagner JR, Laird MR, Melli G, Rey S et al.** PSORTb 3.0: improved  
156 protein subcellular localization prediction with refined localization subcategories and  
157 predictive capabilities for all prokaryotes. *Bioinformatics* 2010;26(13):1608-1615.
- 158 7. **Goldberg T, Hecht M, Hamp T, Karl T, Yachdav G et al.** LocTree3 prediction of  
159 localization. *Nucleic acids research* 2014;42(Web Server issue):W350-355.

- 160 8. **Li L, Stoeckert CJ, Jr., Roos DS.** OrthoMCL: identification of ortholog groups for  
161 eukaryotic genomes. *Genome research* 2003;13(9):2178-2189.
- 162 9. **Elsen S, Huber P, Bouillot S, Coute Y, Fournier P et al.** A type III secretion  
163 negative clinical strain of *Pseudomonas aeruginosa* employs a two-partner secreted  
164 exolysin to induce hemorrhagic pneumonia. *Cell host & microbe* 2014;15(2):164-176.
- 165 10. **Casabona MG, Robert-Genthon M, Grunwald D, Attree I.** Defining Lipoprotein  
166 Localisation by Fluorescence Microscopy. *Methods in molecular biology* 2017;1615:65-  
167 74.
- 168 11. **Casabona MG, Vandenbrouck Y, Attree I, Coute Y.** Proteomic characterization  
169 of *Pseudomonas aeruginosa* PAO1 inner membrane. *Proteomics* 2013;13(16):2419-  
170 2423.
- 171 12. **Cox J, Mann M.** MaxQuant enables high peptide identification rates, individualized  
172 p.p.b.-range mass accuracies and proteome-wide protein quantification. *Nature*  
173 *biotechnology* 2008;26(12):1367-1372.
- 174 13. **Schwanhauser B, Busse D, Li N, Dittmar G, Schuchhardt J et al.** Global  
175 quantification of mammalian gene expression control. *Nature* 2011;473(7347):337-342.
- 176 14. **Wieczorek S, Combes F, Lazar C, Gai Gianetto Q, Gatto L et al.** DAPAR &  
177 ProStaR: software to perform statistical analyses in quantitative discovery proteomics.  
178 *Bioinformatics* 2017;33(1):135-136.

179

180

181 Figure S1 Legend

182 **Fig. S1 Details of whole-genome comparison between PA7 and CLJ strains**

183 The outer ring shows all the genes in the strains colored according to their COG (Clusters  
184 of Orthologous Groups) functional categories, as listed in the legend. The three other  
185 rings represent the PA7 (orange), CLJ3 (green), and CLJ1 (red) genomes. The color code  
186 was as follows: white, the gene was absent from the genome; gray, the gene or its  
187 homolog was present in a different position in the genome; black in the CLJ rings



188 correspond to gaps between contigs. The inner labels indicate CLJ-specific regions,  
189 whereas the outer labels are PA7-specific regions (represented in RGPs or PSPA7 locus  
190 numbers) described in Table S3 and Table S4, respectively.

191 **Table S1** Genome assembly and annotation statistics

192 **Table S2** RT-qPCR primers used

193 **Table S3** Specific regions of CLJ compared to PA7

194 **Table S4** Specific regions of PA7 compared to CLJ

195 **Table S5** Genes in CLJ-SR14

196 **Table S6** BLASTN search result of CLJ-ISL3 (2985 bp) against the ISfinder database  
197 with E-value of 0

198 **Table S7** Prediction of CLJ-ISL3 insertions between contigs of CLJ3, as described in  
199 Materials and Methods

200 **Table S8** Differential proteomic analysis between CLJ1 and CLJ3 in total proteome,  
201 membrane proteome, and secretome proteome

202 **Table S9** Differential gene expression analysis between CLJ1 and CLJ3

203 **Table S10** Genes/proteins that are statistically significantly differentially expressed  
204 between CLJ1 and CLJ3 in both RNA-Seq and at least one of the proteomics datasets

205 **Table S11** CLJ phage-related regions

206

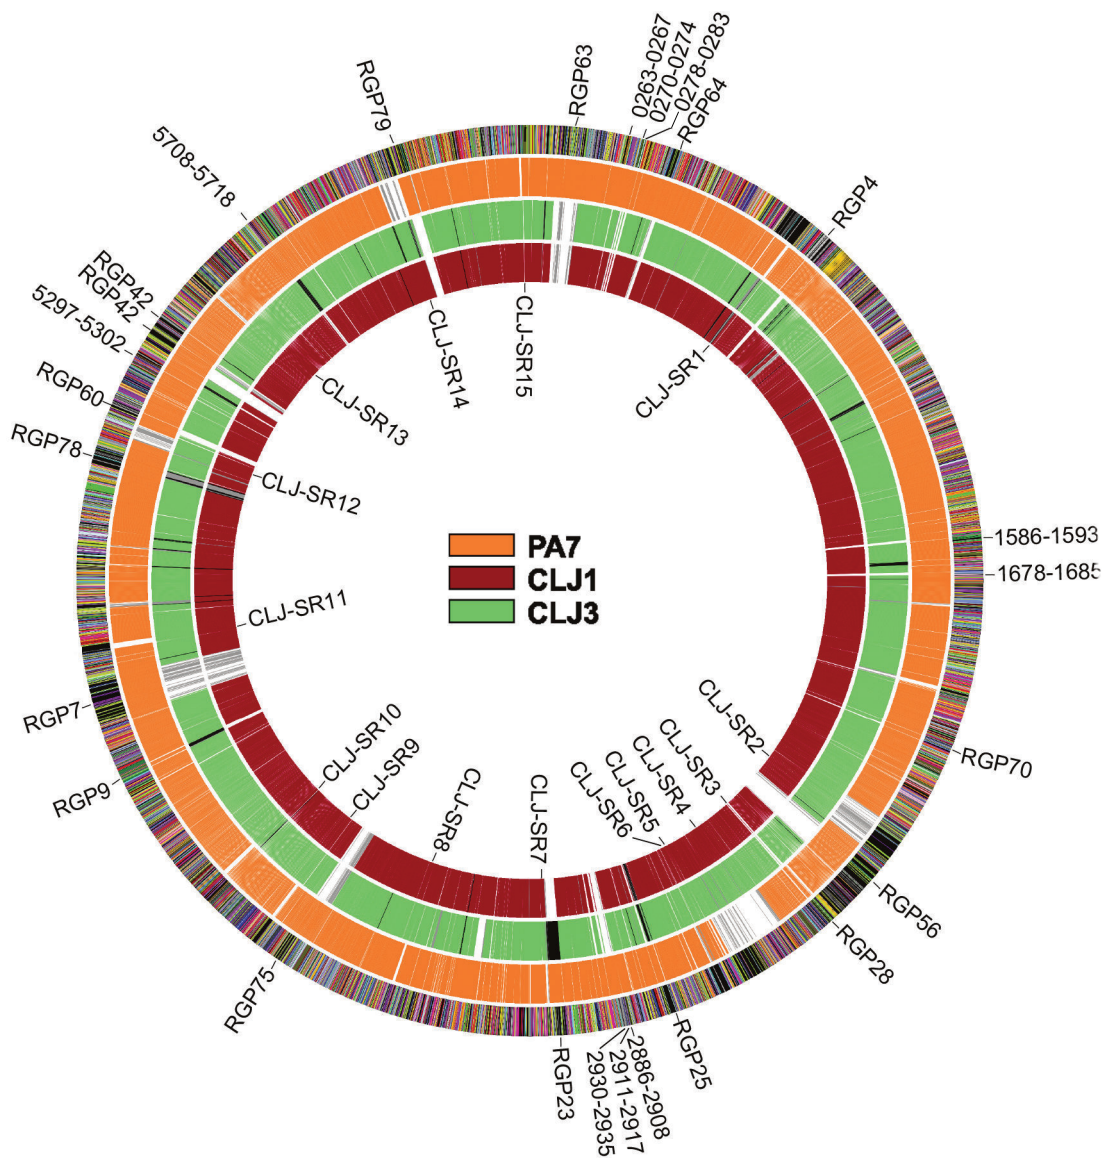

**COG (Clusters of Orthologous Groups) functional categories**

- RNA processing and modification
- Energy production and conversion
- Cell cycle control, cell division, chromosome partitioning
- Amino acid transport and metabolism
- Nucleotide transport and metabolism
- Carbohydrate transport and metabolism
- Coenzyme transport and metabolism
- Lipid transport and metabolism
- Translation, ribosomal structure and biogenesis
- Transcription
- Replication, recombination and repair
- Cell wall/membrane/envelope biogenesis
- Cell motility
- Posttranslational modification, protein turnover, chaperones
- Inorganic ion transport and metabolism
- Secondary metabolites biosynthesis, transport and catabolism
- Signal transduction mechanisms
- Intracellular trafficking, secretion, and vesicular transport
- Defense mechanisms
- Multiple classes
- General function prediction only
- Function unknown
- No COG

**Figure S1**

**Table S1.** Genome assembly and annotation statistics

|                                          | <b>CLJ1</b> | <b>CLJ3</b> |
|------------------------------------------|-------------|-------------|
| <b>Number of contigs/scaffolds</b>       | 68          | 135         |
| <b>Average coverage (x)</b>              | 98.3        | 96.9        |
| <b>Contig/scaffold size (bp)</b>         | 201-847201  | 1025-297138 |
| <b>Average contig/scaffold size (bp)</b> | 95801       | 47065       |
| <b>Contig/scaffold N50 (bp)</b>          | 456227      | 97517       |
| <b>Total genome size (bp)</b>            | 6514448     | 6353726     |
| <b>G+C content (%)</b>                   | 66.6        | 66.6        |
| <b>Protein coding sequences</b>          | 6259        | 6107        |
| <b>tRNA</b>                              | 62          | 57          |
| <b>rRNA</b>                              | 9           | 3           |

**Table S2.** RT-qPCR primers used

| <b>Name</b>                    | <b>5'-3' sequence</b>                                    | <b>Amplicon size</b> |
|--------------------------------|----------------------------------------------------------|----------------------|
| qPCR-hcnB-F<br>qPCR-hcnB-R     | TACGGTGATCTGCCGTTGTG<br>GATCGCTGCAATAGCCGATG             | 152 bp               |
| qPCR-pvdE-F<br>qPCR-pvdE-R     | CCAATCCCGAACCCCTACCTG<br>TTCTCGCCGACGATGAAGAG            | 184 bp               |
| qPCR-ampDH3-F<br>qPCR-ampDH3-R | GCGACAACCTCAACGACACC<br>CATTCTTCGGCGTCATGTCC             | 165 bp               |
| qPCR-2958-F2<br>qPCR-2958-R2   | CGGCATCGAGCACTGCTACT<br>CCAGTTCGTGGCCGATGAT              | 152 bp               |
| qPCR-ccoG2-F<br>qPCR-ccoG2-R   | GCTGGACCTGGAAAGCCTGT<br>GGCGTCGTAGGAAACGATCA             | 160 bp               |
| qPCR-ccoN4-F<br>qPCR-ccoN4-R   | TGGGCAATACCACCACCAAG<br>CGGTGGTCAGGATGAACGAG             | 171 bp               |
| oprD-up<br>oprD-up             | GGGTTTCATCGAAGACAGCAG<br>TGCCTTGGGTGAAGCCGGATT           | 139 bp               |
| uvrD-up<br>uvrD-down           | CATATCCTGGTGGACGAGTTCC<br>CGCTGAACTGCTGGATGTTCTC         | 160 bp               |
| rpoD-qPCR F1<br>rpoD-qPCR R1   | GCG-CAA-CAG-CAA-TCT-CGT-CT<br>ATC-CGG-GGC-TGT-CTC-GAA-TA | 177 bp               |

**Table S3.** Specific regions of CLJ compared to PA7

| Region   | RGP <sup>1</sup> | CLJ1 locus | Number of genes | Features                                                    |
|----------|------------------|------------|-----------------|-------------------------------------------------------------|
| CLJ-SR1  | RGP66            | 0487-0494  | 8               | Phage-related                                               |
| CLJ-SR2  | RGP29*           | 2128-2214  | 87              | PAGI-2-like island                                          |
| CLJ-SR3  | RGP28            | 2316-2322  | 6               | Mobile element proteins                                     |
| CLJ-SR4  | RGP27            | 2415-2573  | 160             | Dit island                                                  |
| CLJ-SR5  | RGP72            | 2579-2583  | 5               | D-galactonate catabolism                                    |
| CLJ-SR6  | RGP26            | 2615-2621  | 7               | Phage-related; lytic enzymes                                |
| CLJ-SR7  | RGP23            | 2917-2924  | 7               | Cup fimbria, Mobile element proteins; possible DNA helicase |
| CLJ-SR8  |                  | 3303-3309  | 7               | ABC transporter ATP-binding protein                         |
| CLJ-SR9  |                  | 3607-3616  | 9               |                                                             |
| CLJ-SR10 | RGP15            | 3774-3784  | 11              | Threonine dehydratase; ABC transporter proteins             |
| CLJ-SR11 |                  | 4314-4301  | 14              | AlpBCDE-lysis cassette, phage-related                       |
| CLJ-SR12 |                  | 4838-4876  | 39              | Pyrrroloquinoline quinone synthesis proteins                |
| CLJ-SR13 |                  | 5192-5203  | 10              | Phage related; accessory cholera enterotoxin                |
| CLJ-SR14 |                  | 5811-5871  | 55              | Heavy metal resistance                                      |
| CLJ-SR15 |                  | 6156-6161  | 6               | Phage-related                                               |

<sup>1</sup>RGP: region of genomic plasticity, as defined in Mathee *et al.* (2008). The numbering corresponds to published RGPs. \*CLJ strains do not share any genes with PA7 in the RGP.

**Table S4.** Specific regions of PA7 compared to CLJ

| PSPA7 numbering | Number of genes | RGP <sup>1</sup> | Features                                                                        |
|-----------------|-----------------|------------------|---------------------------------------------------------------------------------|
| 0069-0139       | 71              | RGP63*           | Type I restriction-modification system; mercury resistance cluster              |
| 0263-0267       | 5               |                  | Sulfate ester transport system                                                  |
| 0270-0274       | 5               |                  |                                                                                 |
| 0278-0283       | 6               |                  | <i>tonB2-exbB1-exbD1</i> operon                                                 |
| 0355-0369       | 15              | RGP64*           | Phage-related                                                                   |
| 0776-0788       | 12              | RGP4*            | Phage-related                                                                   |
| 1586-1593       | 8               |                  | Polymyxin and cationic antimicrobial peptide resistance cluster                 |
| 1678-1685       | 8               |                  | Sulfur starvation utilization operon                                            |
| 2109-2112       | 4               | RGP70            | Probable transposase                                                            |
| 2363-2435       | 73              | RGP56*           | Phage-related                                                                   |
| 2515-2526       | 10              | RGP28            |                                                                                 |
| 2790-2795       | 6               | RGP25            | Hemagglutinins                                                                  |
| 2886-2908       | 23              |                  | Hcp secretion island-3 encoded type VI secretion system (H3-T6SS)               |
| 2911-2917       | 7               |                  | Methionine ABC transporters; monooxygenases                                     |
| 2930-2935       | 6               |                  | Alkanesulfonate assimilation; nitrate and nitrite ammonification                |
| 3034-3071       | 37              | RGP23            | Pyocin killing protein; cup fimbria, phage-related                              |
| 3695-3747       | 53              | RGP75*           | Conjugal transfer protein cluster; resistance genes; transcriptional regulators |
| 4281-4289       | 9               | RGP9             | Rieske family iron-sulfur cluster-binding protein                               |
| 4427-4530       | 103             | RGP7             | pKLC102-like, Type IV B pilus protein cluster                                   |
| 5053-5075       | 23              | RGP78            | Phage-related                                                                   |
| 5143-5160       | 17              | RGP60*           | Phage-related, type IV pilin accessory protein                                  |
| 5297-5302       | 6               |                  | Fimbrial chaperone/usher pathway E operon                                       |

|                  |    |        |                                                              |
|------------------|----|--------|--------------------------------------------------------------|
| <b>5324-5357</b> | 34 | RGP42  | Mobile element proteins; Streptomycin phosphotransferase     |
| <b>5364-5378</b> | 15 | RGP42  | Phage-related                                                |
| <b>5708-5718</b> | 11 |        | Arginine:pyruvate transaminase; 2-ketoarginine decarboxylase |
| <b>6033-6063</b> | 31 | RGP79* | Type I restriction-modification system                       |

<sup>1</sup>RGP: region of genomic plasticity, as defined in Mathee *et al.* (2008). The numbering corresponds to published RGPs. \*PA7 does not share any genes with CLJ strains in the RGP.

**Table S5.** Genes in CLJ-SR14

| PA7 | CLJ1      | CLJ3      | RAST annotation                                                                    |
|-----|-----------|-----------|------------------------------------------------------------------------------------|
| NA  | CLJ1_5811 | CLJ3_5608 | MG(2+) CHELATASE FAMILY PROTEIN / ComM-related protein                             |
| NA  | CLJ1_5814 | CLJ3_5609 | hypothetical protein                                                               |
| NA  | CLJ1_5815 | CLJ3_5610 | hypothetical protein                                                               |
| NA  | CLJ1_5817 | CLJ3_0003 | hypothetical protein                                                               |
| NA  | CLJ1_5818 | CLJ3_0004 | Error-prone, lesion bypass DNA polymerase V (UmuC)                                 |
| ns  | CLJ1_5819 | CLJ3_0005 | hypothetical protein                                                               |
| ns  | CLJ1_5820 | CLJ3_0006 | Mercuric ion reductase (EC 1.16.1.1)                                               |
| ns  | CLJ1_5821 | CLJ3_0007 | Mercuric transport protein, MerC                                                   |
| ns  | CLJ1_5822 | CLJ3_0008 | Periplasmic mercury(+2) binding protein                                            |
| ns  | CLJ1_5823 | CLJ3_0009 | Mercuric transport protein, MerT                                                   |
| ns  | CLJ1_5824 | CLJ3_0010 | Mercuric resistance operon regulatory protein                                      |
| ns  | CLJ1_5825 | CLJ3_0011 | hypothetical protein                                                               |
| NA  | CLJ1_5826 | CLJ3_0012 | Sterol desaturase                                                                  |
| NA  | CLJ1_5827 | CLJ3_0013 | Transcriptional regulator, AraC family                                             |
| NA  | CLJ1_5828 | CLJ3_0014 | Lipoprotein signal peptidase (EC 3.4.23.36)                                        |
| NA  | CLJ1_5829 | CLJ3_0015 | hypothetical protein                                                               |
| NA  | CLJ1_5830 | CLJ3_0016 | Cobalt-zinc-cadmium resistance protein CzcD                                        |
| NA  | CLJ1_5831 | CLJ3_0017 | COG3267: Type II secretory pathway, component ExeA (predicted ATPase)              |
| NA  | CLJ1_5832 | CLJ3_0018 | FIG131328: Predicted ATP-dependent endonuclease of the OLD family                  |
| ns  | CLJ1_5833 | CLJ3_0019 | Mobile element protein                                                             |
| ns  | CLJ1_5834 | CLJ3_0020 | Mobile element protein                                                             |
| NA  | CLJ1_5836 | CLJ3_6032 | transcriptional regulator MvaT, P16 subunit, putative                              |
| ns  | CLJ1_5837 | CLJ3_6031 | Gifsy-2 prophage protein                                                           |
| ns  | CLJ1_5838 | CLJ3_6030 | Error-prone repair protein UmuD                                                    |
| ns  | CLJ1_5839 | CLJ3_6029 | Error-prone, lesion bypass DNA polymerase V (UmuC)                                 |
| NA  | CLJ1_5840 | CLJ3_6028 | putative (L31491) ORF2; putative [Plasmid pTOM9]                                   |
| NA  | CLJ1_5841 | CLJ3_6027 | putative ORF1 [Plasmid pTOM9]                                                      |
| NA  | CLJ1_5842 | CLJ3_6026 | NreA-like protein                                                                  |
| NA  | CLJ1_5843 | CLJ3_6025 | Inner membrane protein                                                             |
| NA  | CLJ1_5844 | CLJ3_6024 | probable membrane protein YPO3302                                                  |
| NA  | CLJ1_5845 | CLJ3_6023 | hypothetical protein                                                               |
| NA  | CLJ1_5846 | CLJ3_6022 | hypothetical protein                                                               |
| NA  | CLJ1_5847 | CLJ3_6021 | Chromate transport protein ChrA                                                    |
| NA  | CLJ1_5848 | CLJ3_6020 | Chromate resistance protein ChrB                                                   |
| NA  | CLJ1_5849 | CLJ3_6019 | Phage integrase family protein                                                     |
| NA  | CLJ1_5851 | CLJ3_6018 | RuBisCO operon transcriptional regulator CbbR                                      |
| NA  | CLJ1_5852 | CLJ3_6017 | Phosphonate dehydrogenase (EC 1.20.1.1) (NAD-dependent phosphite dehydrogenase)    |
| NA  | CLJ1_5853 | CLJ3_6016 | Phosphonate ABC transporter permease protein phnE (TC 3.A.1.9.1)                   |
| NA  | CLJ1_5854 | CLJ3_6015 | Phosphonate ABC transporter phosphate-binding periplasmic component (TC 3.A.1.9.1) |
| NA  | CLJ1_5855 | CLJ3_6014 | Phosphonate ABC transporter ATP-binding protein (TC 3.A.1.9.1)                     |
| ns  | CLJ1_5856 | CLJ3_6013 | FIG002188: hypothetical protein                                                    |

|    |           |           |                                                    |
|----|-----------|-----------|----------------------------------------------------|
| ns | CLJ1_5857 | CLJ3_6012 | FIG067310: hypothetical protein                    |
| NA | CLJ1_5858 | CLJ3_6011 | hypothetical protein                               |
| ns | CLJ1_5859 | CLJ3_6010 | Long-chain-fatty-acid--CoA ligase (EC 6.2.1.3)     |
| NA | CLJ1_5860 | gap       | Enoyl-CoA hydratase (EC 4.2.1.17)                  |
| NA | CLJ1_5861 | ns        | Mobile element protein                             |
| NA | CLJ1_5862 | ns        | Mobile element protein                             |
| NA | CLJ1_5863 | gap       | transcriptional regulator, TetR family             |
| NA | CLJ1_5864 | CLJ3_5612 | Error-prone, lesion bypass DNA polymerase V (UmuC) |
| NA | CLJ1_5866 | ns        | Mobile element protein                             |
| NA | CLJ1_5867 | CLJ3_5613 | hypothetical protein                               |
| NA | CLJ1_5868 | CLJ3_5614 | Mobile element protein                             |
| NA | CLJ1_5869 | CLJ3_5615 | hypothetical protein                               |
| NA | CLJ1_5870 | CLJ3_5616 | hypothetical protein                               |
| NA | CLJ1_5871 | CLJ3_5617 | hypothetical protein                               |

NA: no orthologous gene is found in the corresponding genome, ns: orthologous gene(s) is/are found in other location(s) in the corresponding genome, gap: the gene location corresponds to a gap between contigs in the corresponding genome.

**Table S6.** BLASTN search result of CLJ-ISL3 (2985 bp) against the ISfinder database with E-value of 0.

| Sequences producing significant alignments | IS Family | Origin                      | E-value | Identity (%) | Query length (bp) | Query coverage (%) | Gaps (%) |
|--------------------------------------------|-----------|-----------------------------|---------|--------------|-------------------|--------------------|----------|
| ISPst2                                     | ISL3      | <i>Pseudomonas stutzeri</i> | 0,00    | 99,30        | 2984              | 100                | 0,43     |
| ISPPu12                                    | ISL3      | <i>Pseudomonas putida</i>   | 0,00    | 99,27        | 3372              | 43                 | 0,00     |
| IS1396                                     | ISL3      | <i>Serratia marcescens</i>  | 0,00    | 99,27        | 1771              | 41                 | 0,00     |
| ISPst9                                     | ISL3      | <i>Pseudomonas stutzeri</i> | 0,00    | 90,40        | 2472              | 41                 | 0,00     |

**Table S11.** CLJ phage-related regions.

| CLJ1 locus       | Region                    | Number of genes | Corresponding PA7 locus | Mobility gene present |
|------------------|---------------------------|-----------------|-------------------------|-----------------------|
| <b>0462-0497</b> | RGP66 (including CLJ-SR1) | 36              | PSPA7_0678-0716         | Integrase             |
| <b>0535-0557</b> | RGP3                      | 23              | PSPA7_0754-0775         | None                  |
| <b>2607-2624</b> | RGP26 (including CLJ-SR6) | 18              | PSPA7_2648-2661         | Integrase             |
| <b>4295-4314</b> | Including CLJ-SR11        | 20              | PSPA7_4602-4606         | None                  |
| <b>4778-4791</b> | RGP78                     | 14              | PSPA7_5040-5080         | Integrase             |
| <b>5192-5203</b> | CLJ-SR13                  | 12              | NA                      | Integrase             |
| <b>5758-5774</b> | Including RGP6            | 17              | PSPA7_4699-4703         | Integrase             |
| <b>6156-6161</b> | CLJ-SR15                  | 6               | NA                      | None                  |

NA: not applicable
